# Supplementary material for: Cytotoxicity of Triterpene Seco-Acids from Betula pubescens Buds
Source: MDPI journal article supplement (doi:10.3390/molecules24224060), 2019-11-09
Supplement: s1 [file s1]

## Supporting information

associated with article " Cytotoxicity of triterpene *seco*-acids from *Betula pubescens* buds" submitted by Ł. Szoka, V. Isidorov, J. Nazaruk, M. Stocki, L. Siergiejczyk in *Molecules*.

Corresponding author: Valery Isidorov, Forest Faculty, Białystok University of Technology, Hajnówka, Poland

This document contains the following Supporting Information:

**S1 Text. Gas chromatographic-mass spectrometric analysis of separated fractions and isolated compounds.**

**S2 Text Spectroscopic and gas-chromatographic characteristics of triterpene *seco*-acids (1–3) isolated from *Betula pubescens* buds**

**Table S1 Data on  $^{13}\text{C}$  NMR (100 MHz,  $\text{CDCl}_3$ ) spectra of triterpene *seco*-acids (1–3)**

**S1 Text. Gas chromatographic-mass spectrometric analysis of separated fractions and isolated compounds**

GC-MS analysis of obtained fractions and isolated compounds was performed after silanization of polar and non-volatile compounds. For this purpose, 2–3 mg of dry residue after evaporation of eluents (or 1-2 mg of isolated *seco*-acid) was put into a vial of 2 mL in volume and dissolved in 220  $\mu\text{L}$  of pyridine. After adding of 80  $\mu\text{L}$  of BSTFA a vial was sealed and heated for 0.5 h at 60 °C to obtain trimethylsilyl (TMS) derivatives. The GC-MS analyse of fractions was performed on a Agilent 7890A chromatograph with Agilent 5975C mass detector, on a capillary non-polar column HP-5MS (30 m x 0,25 mm x 0,25  $\mu\text{m}$ ) at a helium flow rate of 1 mL/min. An injection of a 1- $\mu\text{L}$  sample was performed using an Agilent 7693A autosampler. The injector worked in a split (1:50) mode at an injector temperature of 300°C. The initial column temperature was 50°C, rising to 320°C, at 3 °C/min; the final temperature was held for 10 min. The ion source and quadrupole temperatures were 230°C and 150°C, respectively. Electron ionization mass spectra (EIMS) were obtained at ionization energy 70 eV.

The hexane solution of  $\text{C}_{10}$ – $\text{C}_{40}$  *n*-alkanes were separated under the above conditions. The linear temperature programmed retention indices ( $I^T$ ) were calculated from the results of separation of *n*-alkanes and silanized isolated *seco*-acids.

## S2 Text. Spectroscopic and gas-chromatographic characteristics of triterpene *seco*-acids (1–3) isolated from *Betula pubescens* buds

### 3,4-*seco*-Urs-4(23),20(30)-dien-3-oic acid (1)

White crystals from EtOH.  $^{13}\text{C}$  NMR (100 MHz,  $\text{CDCl}_3$ ). The results of analysis are presented in Table S1. Results are in accordance with literature data [1]. EIMS-TMS:

109(100),73(92),121(67),107(65),95(60),93(52),81(50),75(48),367(46),135(41), 512( $\text{M}^+$ );  $I^T = 3406$ .

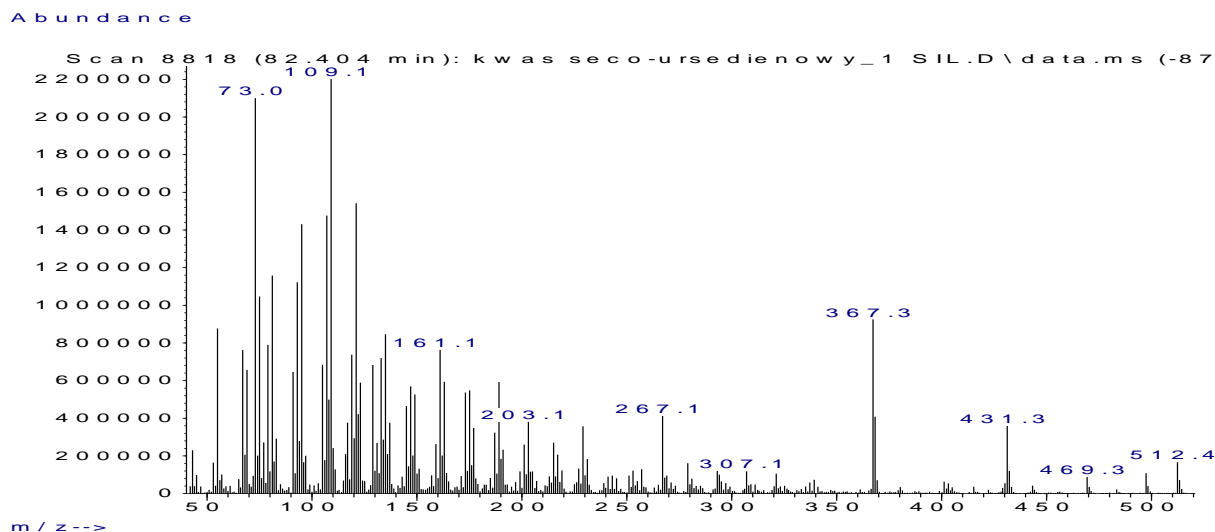

Fig. EMS-1. Mass spectrum of compound (1).

### 3,4-*seco*-Olean-4(24)-en-19-oxo-3-oic acid (2)

White powder from EtOH. The results of  $^{13}\text{C}$  NMR analysis are presented in Table S1. and are agree with literature data [2]. TMS EIMS: 73(100),383(92),107(70), 121(66),75(63),95(63),43(62)109(61),81(51),93(50),528( $\text{M}^+$ ).  $I^T = 3510$ .

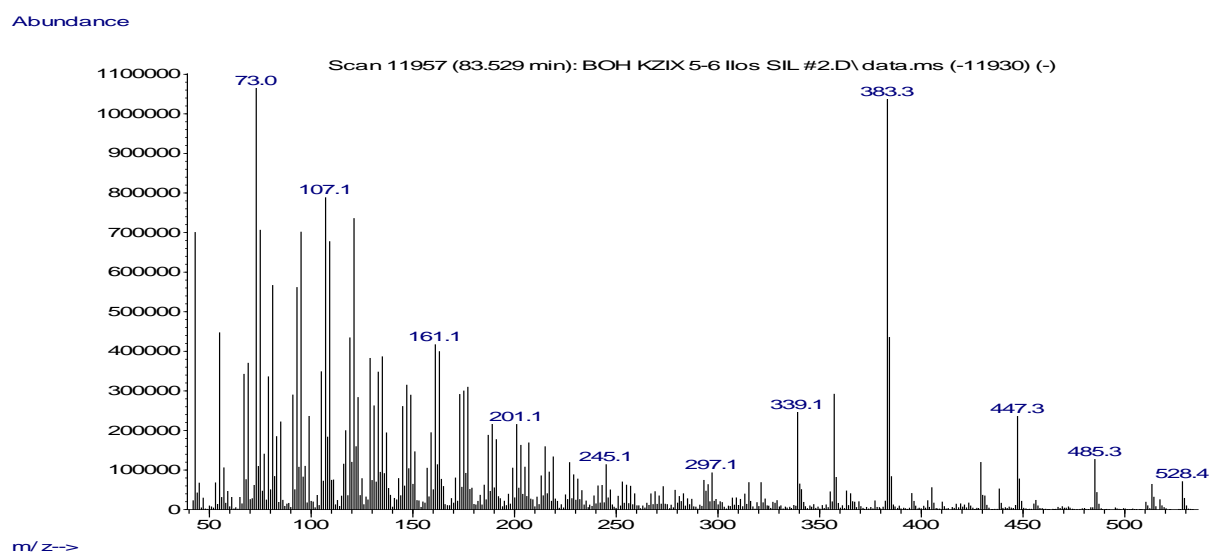

Fig. EMS-2. Mass spectrum of compound (2).

3,4-*seco*-Urs-4(23),20(30)-dien-19-ol-3-oic acid (**3**)

White crystals from EtOH. The results of  $^{13}\text{C}$  NMR analysis are presented in Table S1. and are agree with literature data [2]. TMS EIMS: 75(100),73(64),133(37), 121(35),107(34), 119(33),109(32),105(26),95(26),187(24), 600( $\text{M}^+$ ).  $I^T = 3503$ .

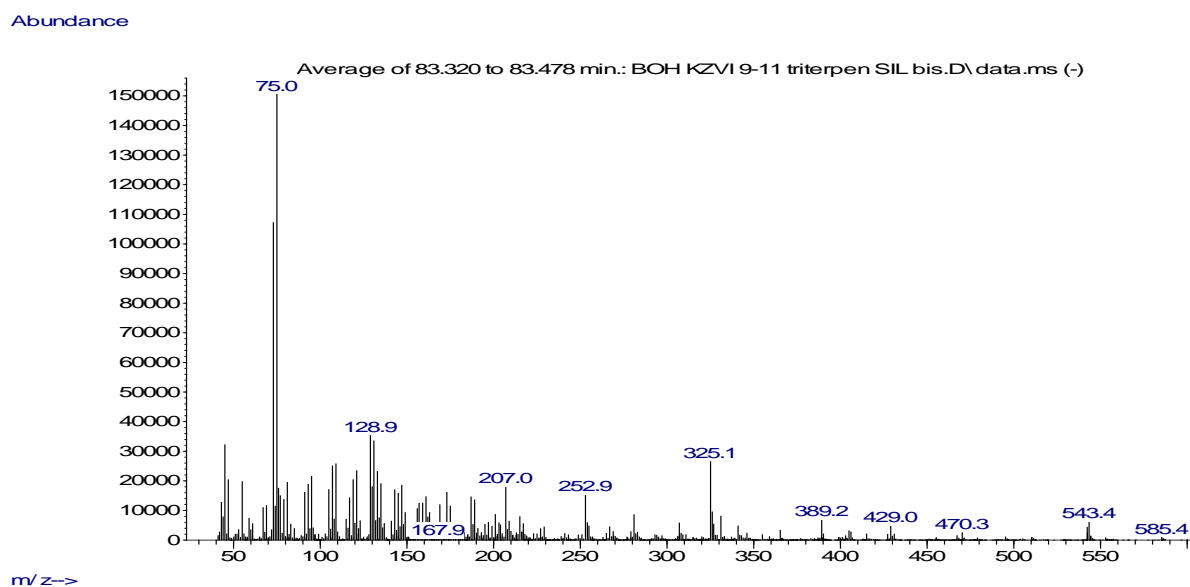

Fig. EMS-3. Mass spectrum of compound (**3**).

**Table S1.** The results of  $^{13}\text{C}$  NMR (100 MHz,  $\text{CDCl}_3$ ) of compounds **1-3** isolated from *Betula pubescens* buds.

| Position | <b>1</b>            | <b>2</b> | <b>3</b> |
|----------|---------------------|----------|----------|
|          | $\delta_{\text{C}}$ |          |          |
| 1        | 34.03               | 33.88    | 34.01    |
| 2        | 28.23               | 28.07    | 28.12    |
| 3        | 176.85              | 178.92   | 179.12   |
| 4        | 147.54              | 147.47   | 147.52   |
| 5        | 50.16               | 50.51    | 50.41    |
| 6        | 24.45               | 24.61    | 24.57    |
| 7        | 32.42               | 32.68    | 32.15    |
| 8        | 40.42               | 40.68    | 42.52    |
| 9        | 39.12               | 40.98    | 41.36    |
| 10       | 39.02               | 39.24    | 39.27    |
| 11       | 21.84               | 21.45    | 21.61    |
| 12       | 25.95               | 25.36    | 26.54    |
| 13       | 40.55               | 34.79    | 33.17    |
| 14       | 42.29               | 43.62    | 40.77    |
| 15       | 26.52               | 27.57    | 37.62    |
| 16       | 38.06               | 37.72    | 36.52    |
| 17       | 34.03               | 43.4     | 36.21    |
| 18       | 48.47               | 50.35    | 44.48    |
| 19       | 39.21               | 213.87   | 73       |

|    |        |        |        |
|----|--------|--------|--------|
| 20 | 154.45 | 54.84  | 151.35 |
| 21 | 25.42  | 37.84  | 24.63  |
| 22 | 38.71  | 40.47  | 37.77  |
| 23 | 113.03 | 23.23  | 23.19  |
| 24 | 22.99  | 113.45 | 113.42 |
| 25 | 20.04  | 20.03  | 20.24  |
| 26 | 15.73  | 15.93  | 15.75  |
| 27 | 14.44  | 15.22  | 15.65  |
| 28 | 19.26  | 20.03  | 16.82  |
| 29 | 25.15  | 25.44  | 28.06  |
| 30 | 106.93 | 20.31  | 107.24 |

1. Kashiwada, Y., Sekiya, M., Yamazaki, K., Ikeshiro, Y, Fujioka, T., Yamagishi, T., Kitagawa, S. & Takaishi, Y. Triterpenoids from the floral spikes of *Betula platyphylla* var. *japonica* and their reversing activity against multidrug-resistant cancer cells. *J. Nat. Prod.* **70**, 623–627. DOI: [10.1021/np060631s](https://doi.org/10.1021/np060631s) (2007).
2. Vedernikov, D.N. & Roshchin, V.I. Extractive compounds of Betulaceae family buds (*Betula pendula* Roth.): V. Composition of triterpene *seco*-acids. *Russ J Bioorg Chem* **38**, 762–768. <https://doi.org/10.1134/S1068162012070229> (2012).
